# Supplementary material for: Qualitative and quantitative rapid detection of VOCs differentially released by VAP-associated bacteria using PTR-MS and FGC-PTR-MS
Source: Royal Society of Chemistry journal article supplement (doi:10.1039/d3an02011h), 2024-01-01
Supplement: d3an02011h2.pdf [file d3an02011h2.pdf]

## Supplementary Information to:

**Article title:** Qualitative and quantitative rapid detection of VOCs differentially released by VAP-associated bacteria using PTR-MS and FGC-PTR-MS

**Journal name:** Analyst

**Authors' names:** Wei Xu, <sup>a,b</sup> Xue Zou, <sup>\*a</sup> Yueting Ding, <sup>c</sup> Qi Zhang, <sup>a,b</sup> Yulan Song, <sup>c</sup> Jin Zhang, <sup>c</sup> Min Yang, <sup>c</sup> Zhou Liu, <sup>c</sup> Qiang Zhou, <sup>\*c</sup> Dianlong Ge, <sup>a</sup> Qiangling Zhang, <sup>a</sup> Wencheng Song, <sup>a</sup> Chaoqun Huang, <sup>a</sup> Chengyin Shen, <sup>\*a,d</sup> and Yannan Chu <sup>a</sup>

*<sup>a</sup> Anhui Province Key Laboratory of Medical Physics and Technology, Institute of Health and Medical Technology, Hefei Institutes of Physical Science, Chinese Academy of Sciences, 230031, Hefei, China*

*<sup>b</sup> University of Science and Technology of China, 230026, Hefei, China*

*<sup>c</sup> The Second Hospital of Anhui Medical University, 230601, Hefei, China*

*<sup>d</sup> Hefei Cancer Hospital, Chinese Academy of Sciences, 230031, Hefei, China*

### \* Corresponding authors:

Xue Zou

Email: [xzou@cmpt.ac.cn](mailto:xzou@cmpt.ac.cn)

Qiang Zhou

Email: [zhouqiang1973@163.cn](mailto:zhouqiang1973@163.cn)

Chengyin Shen

Email: [chyshen@aiofm.ac.cn](mailto:chyshen@aiofm.ac.cn)

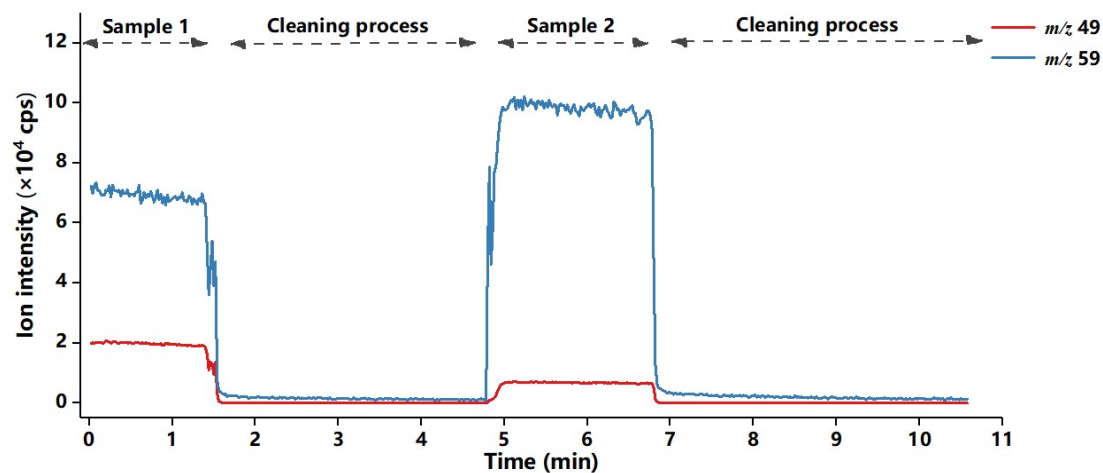

**Fig. S1** Schematic diagram of sample injection and cleaning process.

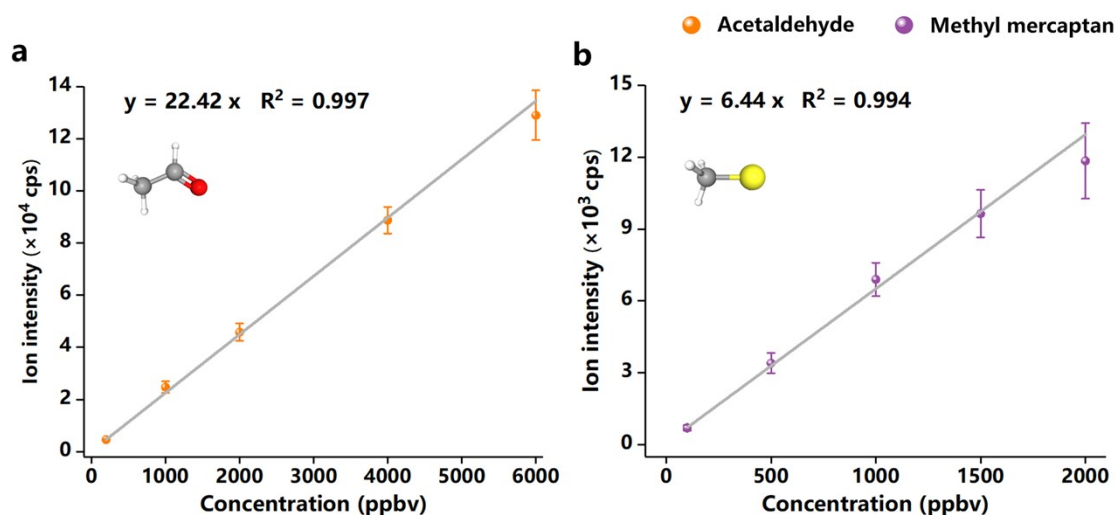

**Fig. S2** Calibration curves obtained using standard gas. (a) Acetaldehyde. (b) Methyl mercaptan.

PTR-MS measurable VOCs library in **Table 1**:

<http://glovocs.creaf.cat/guide/>
